# Supplementary material for: Surface-enhanced confocal Raman microscopy to characterize esophageal cancer cell-derived extracellular vesicles and maternal cells
Source: Royal Society of Chemistry journal article supplement (doi:10.1039/d4ay02300e), 2025-01-01
Supplement: d4ay02300e1.pdf [file d4ay02300e1.pdf]

## Supplementary Material

# Surface-enhanced confocal Raman microscopy to characterize esophageal cancer cell-derived extracellular vesicles and maternal cells

Qianjin Liu,<sup>a</sup> Mengdong Liu,<sup>b</sup> Wenjing Lu,<sup>b</sup> Han Li,<sup>b</sup> Zixuan Ma,<sup>b</sup> Jingwei Xiong<sup>\*a</sup> and Ping Zhang<sup>\*b</sup>

<sup>a</sup>College of Future Technology, and State Key Laboratory of Natural and Biomimetic Drugs, Peking University, Beijing 100871, China. Email: [jingwei\\_xiong@pku.edu.cn](mailto:jingwei_xiong@pku.edu.cn)

<sup>b</sup>College of Chemistry and Life Science, Beijing University of Technology, Beijing 100124, China. Email: [zplife@bjut.edu.cn](mailto:zplife@bjut.edu.cn)

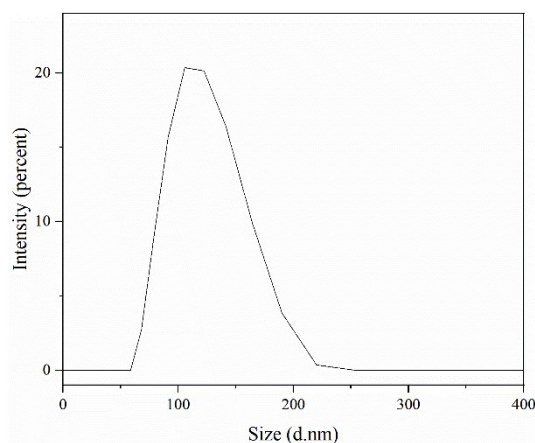

Figure S1. DLS of extracellular vesicles derived from EC109 cells.

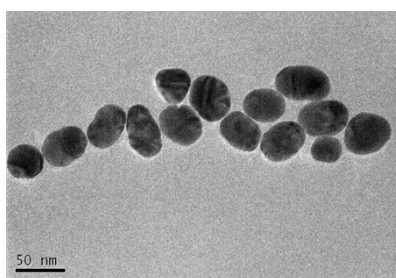

Figure S2. TEM of AuNPs.

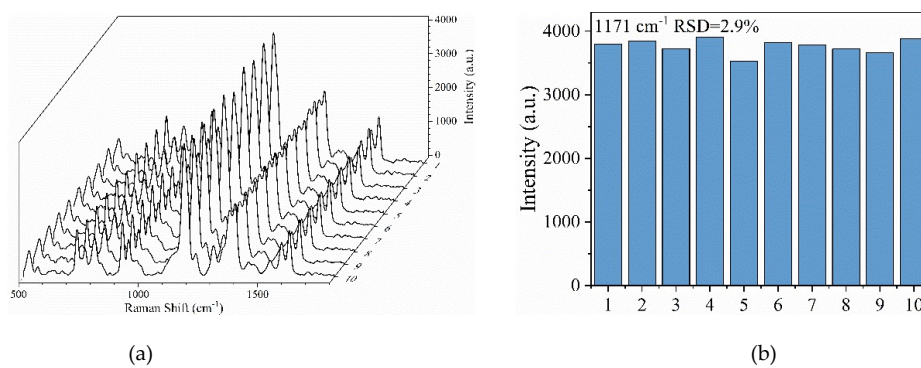

Figure S3. (a) Surface-enhanced Raman scattering (SERS) of crystal violet (CV) amplified using 10 batches of enhanced substrates. (b) Relative standard deviation (RSD) of the characteristic peak intensities of CV at  $1171 \text{ cm}^{-1}$ .

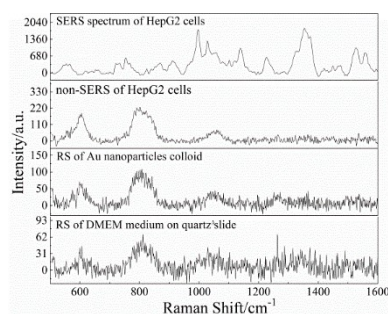

Figure S4. The normal Raman spectroscopy (RS) of HepG2 cells.

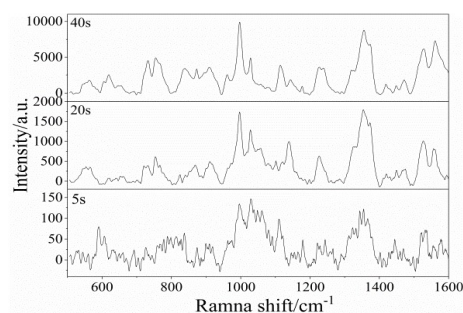

Figure S5. Various integration times employed for SERS detection of adherent HepG2 cells under 1 mW laser power.

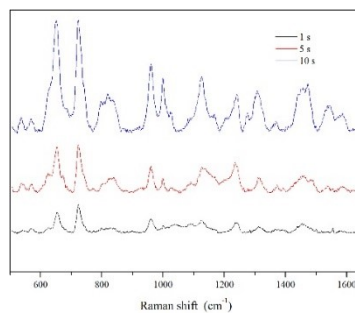

Figure S6. Various integration times used for SERS detection of exosomes.
